# Supplementary material
Source: Elsevier journal article supplement (https://www.sciencedirect.com/science/article/pii/S0210480615002405)
Supplement: mmc1 [file S0210480615002405:mmc1.pdf]

**Tabla 3. Síntesis de los estudios realizados en los últimos 10 años sobre los tratamientos para la incontinencia urinaria en la mujer deportista**

| REFERENCIA             | OBJETIVO                                                                                                                                                                                                 | MUESTRA                                                                                                                                      | MEDIDAS PRE-POST TRATAMIENTO                                                                                                                                                                                                                                                                                                                                                                                                 | TRATAMIENTO                                                                                                                                                                                                      | RESULTADOS                                                                                                                                                                                                                                                                                                                                                                                                                                                                                                                | CONCLUSIONES                                                                                                                                                                                                                                                                                                                                                                                                    |
|------------------------|----------------------------------------------------------------------------------------------------------------------------------------------------------------------------------------------------------|----------------------------------------------------------------------------------------------------------------------------------------------|------------------------------------------------------------------------------------------------------------------------------------------------------------------------------------------------------------------------------------------------------------------------------------------------------------------------------------------------------------------------------------------------------------------------------|------------------------------------------------------------------------------------------------------------------------------------------------------------------------------------------------------------------|---------------------------------------------------------------------------------------------------------------------------------------------------------------------------------------------------------------------------------------------------------------------------------------------------------------------------------------------------------------------------------------------------------------------------------------------------------------------------------------------------------------------------|-----------------------------------------------------------------------------------------------------------------------------------------------------------------------------------------------------------------------------------------------------------------------------------------------------------------------------------------------------------------------------------------------------------------|
| Rivalta et al. (2010)  | 1. Aplicar en tres mujeres atletas con IU un programa de rehabilitación de suelo pélvico combinado (EES, BFB, EMSP, y EMSP con CV).<br>2. Comprobar su eficacia en relación a la desaparición de la IUE. | 3 mujeres jugadoras de voleibol. IU, en deporte y vida cotidiana. 1 grupo único. Nuliparas, rango 29-33 años.                                | Diario miccional de 48 horas. Evaluación urodinámica(cantidad de pérdida de orina) Exámen uroginecológico(estado general de los MS). Prueba puborectal(función y fuerza de la musculatura del suelo pélvico). Necesidad de usar protector íntimo durante entrenamiento o competición (antes y después del tratamiento).                                                                                                      | 1) EEF.<br>2) BFB.<br>3) EMSP.<br>4) EMSP con CV.                                                                                                                                                                | El médico especialista informó de una mejora en todas las mujeres. Las atletas dejaron de utilizar almohadilla y salvasilips, en deporte y en vida diaria. El exámen del músculo puboccígeo: (PC-test) antes:paciente 1:2, paciente 2:1, paciente 3:2. (PC-test) después: paciente 1:5, paciente 2:5, paciente 3:5. Grado 0: sin respuesta. G1: parpadeo. G2: contracción débil. G3: contracción moderada. G4: buena contracción, contra cierta resistencia. G5: contracción muscular normal, fuerte, apretar y levantar. | 1. Revisiones uroginecológicas periódicas en mujeres atletas.<br>2. Tener en cuenta los aumentos de presión abdominal y la falta de apoyo del MEA, representan la base del descenso visceral y la disminución de reacción abdomino perineal, perjudicando la continencia.<br>3. La IUE en las atletas se puede tratar con el tratamiento combinado(EES, BFB, EMSP, y EMSP con CV),obteniendo buenos resultados. |
| Da Roza et al. (2012)  | 1. Comprobar que el EMSP puede fortalecer la MSP y mejorar los síntomas de IU en este grupo de estudio.                                                                                                  | 16 mujeres estudiantes de deporte (20.0±0.8 años) . Nuliparas, incontinentes. Altos niveles de actividad física (IPAQ-SF).                   | 1. Cuestionario: edad, peso, altura, embarazos, edad de menarquia, etnia, educación, deporte practicado, cantidad de entrenamiento. 2. IPAQ-SF:nivel de actividad física. 3. ICIQ UI SF: (1)frecuencia de IU, (2)cantidad de fuga, (3)impacto general de IU. (4)cuestionario, ocho preguntas sobre síntomas que determinan el tipo de IU. 4. Palpación vaginal:medir correcta CV de MSP. 5.Perinometría: CMV(fuerza de MSP). | 1)Conocimiento de la MSP a través de feedback proporcionado durante la palpación vaginal. 2)Contracciones de la MSP. 3)Contraer la MSP durante la marcha. 4) Contraer la MSP durante las actividades deportivas. | 7 mujeres completan el estudio. 6 de ellas obtienen mejoras. Presión de reposo vaginal mejoró un 17.4 cmH <sub>2</sub> O (SD 6.7), p=0.04 y la CMV mejoró un 16.4 cmH <sub>2</sub> O (SD 5.8), p=0.04. Frecuencia de pérdida de orina mejoró: (1,6 ± 1,5 vs 0,1± 0,4)p=0.020. Cantidad de pérdida de orina mejoró: (2,6± 1,5 vs 0,3 ± 0,8)p=0.020. Impacto en calidad de vida, no hubo mejora significativa: (2,9± 3,8 vs 0,9± 2,3)p=0.066. Puntuación ICIQ-SF mejoró: (4,08±6,0 vs 0,75± 2,6)p= .027                     | 1. El EMSP aumenta la fuerza de la MSP, reduciendo la frecuencia y la cantidad de episodios de pérdida de orina, en este grupo de estudio después de 8 semanas de tratamiento.                                                                                                                                                                                                                                  |
| Ferreira et al. (2014) | 1. Verificar la eficacia de un programa de rehabilitación de la MSP, en atletas de voleibol femenino.<br>2. Analizar la cantidad y la frecuencia de pérdidas de orina.                                   | 32 jugadoras de voleibol con IUE. Pérdida de orina superior a 1g Rango 13-30 años. Dos grupos divididos aleatoriamente. GE(n=16) y GC(n=16). | 1. Cuestionario. 2. Pad test (cantidad de pérdida de orina): una almohadilla(compresa) previamente pesada se coloca en las atletas, estas realizan 15' de ejercicio físico y se les retira y se vuelve a pesar(pérdidas superiores a 1g son incontinentes). 3. Evaluación de la frecuencia de pérdidas de orina (diario urinario): registro diario de pérdidas de orina durante 7 días consecutivos.                         | GE= 1. Acción educativa, concienciación de la MSP y folleto informativo. 2. Ejercicios MSP. GC= sólo folleto con resumen de la acción educativa.                                                                 | GE= cantidad de pérdida de orina se redujo 45,5%, GC= disminución 4,9%. GE= frecuencia de episodios de pérdida se redujo 14,3%, GC= disminución 0,05%.                                                                                                                                                                                                                                                                                                                                                                    | 1. Programa de rehabilitación de los MSP fue eficaz para la reducción de la IUE en atletas de voleibol. 2. La rehabilitación de los MSP permite una mejora significativa de los síntomas clínicos de cantidad y frecuencia de pérdida de orina.                                                                                                                                                                 |

GE: grupo experimental; GC: grupo control; SP: suelo pélvico; IU: incontinencia urinaria; EMSP: entrenamiento de la musculatura del suelo pélvico; EEF: estimulación eléctrica funcional; BFB: biofeedback; CV: conos vaginales; IUE: incontinencia urinaria de esfuerzo; MSP: musculatura del suelo pélvico; MEA: músculo elevador del ano; PC: puboccígeo test; IPAQ-SF: International Physical Activity Questionnaire-Short; ICIQ UI-SF: International Consultation on Incontinence Questionnaire-Short form; CMV: contracción máxima voluntaria; CV: contracción voluntaria.

**Tabla 4. Síntesis de los estudios realizados en los últimos 10 años sobre los tratamientos para la incontinencia urinaria en la mujer en general**

| REFERENCIA                   | OBJETIVOS                                                                                                                                                                                                                                                                            | MUESTRA                                                                                                                                                                                                                                                                                            | MEDIDAS PRE-POST<br>TRATAMIENTO                                                                                                                                                                                                                                                                                                                                                                                                                          | TRATAMIENTO                                                                                                                                                                                                                                             | RESULTADOS                                                                                                                                                                                                                                                                                                                        | CONCLUSIONES                                                                                                                                                                                                                                                                                                                   |
|------------------------------|--------------------------------------------------------------------------------------------------------------------------------------------------------------------------------------------------------------------------------------------------------------------------------------|----------------------------------------------------------------------------------------------------------------------------------------------------------------------------------------------------------------------------------------------------------------------------------------------------|----------------------------------------------------------------------------------------------------------------------------------------------------------------------------------------------------------------------------------------------------------------------------------------------------------------------------------------------------------------------------------------------------------------------------------------------------------|---------------------------------------------------------------------------------------------------------------------------------------------------------------------------------------------------------------------------------------------------------|-----------------------------------------------------------------------------------------------------------------------------------------------------------------------------------------------------------------------------------------------------------------------------------------------------------------------------------|--------------------------------------------------------------------------------------------------------------------------------------------------------------------------------------------------------------------------------------------------------------------------------------------------------------------------------|
| Culligan et al. (2011)       | 1. Determinar si un programa de EMSP y un programa de ejercicios de Pilates, podrían proporcionar mejoras similares en la fuerza de la musculatura de la pelvis.                                                                                                                     | 62 no embarazadas. ≥18 Participantes sufrían de laguna disfunción del suelo pélvico como IUE, otras no tenían patología. Dos grupos divididos aleatoriamente. Grupo EMSP(n=32). Grupo Pilates(n=30).                                                                                               | 1.Examen físico.<br>2.Exámen pélvico: medición de fuerza MSP con un sensor de presión vaginal computarizado (Camino™ CTS 2000, El Grupo Prometeo, Dover, Nueva Hampshire, EE.UU.). 3 mediciones pre-tratamiento y 3 post-tratamiento. Medición: 3CMV durante 10". La media de los 3 valores forma la puntuación.<br>3. Evaluación de síntomas de disfunciones del SP: cuestionario de malestar pélvico(PFDI20) e impacto en la calidad de vida(PFIQ-7 ). | 24 sesiones, 1 hora, 2 veces/semana, 12 semanas. Sesiones individualizadas. Programa de EMSP                                                                                                                                                            | 1. Media de mejora de fuerza EMSP: $6,6 \pm 7,4$ cm de H <sub>2</sub> O (p = 0,0002).<br>2. Media de mejora PFDI20 en EMSP: $27,4 \pm 24,7$ puntos (53%)(p < 0,0001).<br>3. Media de mejora PFIQ-7 en EMSP: $12,3 \pm 30,9$ (55%)(p = 0,043).                                                                                     | 1. Se producen mejoras significativas en la FMSP con los dos programas.<br>2. Se requieren más estudios para determinar si Pilates puede tratar las disfunciones del SP.                                                                                                                                                       |
| Konstantinidou et al. (2007) | 1. Comparar la eficacia del EMSP bajo supervisión intensiva y en grupo a la eficacia del EMSP en casa e individual, en mujeres con IUE.                                                                                                                                              | 30 mujeres con IU. Rango 34-60 años. Dos grupos divididos aleatoriamente. Grupo A: grupo control(N=15). Grupo B: grupo intervención(N=15)                                                                                                                                                          | Evaluación inicial: historial de incontinencia psicosocial y médico, evaluación MSP según escala Oxford. Evaluación de la incontinencia: diario miccional de 7 días y un pad test de 24hr. Formulario de evaluación de la continencia.                                                                                                                                                                                                                   | . Grupo A: instrucciones para EMSP y revisión cada 4 semanas.<br>Grupo B: instrucciones para EMSP y sesión semanal en subgrupos de 5.                                                                                                                   | Grupo B mejoró con respecto Grupo A(100% vs 20%).                                                                                                                                                                                                                                                                                 | 1. Grupo EMSP bajo supervisión intensiva mejoró significativamente en resultados primarios y secundarios a corto plazo en comparación con el tratamiento individual, sin supervisión del EMSP.                                                                                                                                 |
| Huebner et al. (2010)        | 1. Comparar tres estrategias diferentes de EMSP, 1ºEMG biofeedback-asistido, EMSP y estimulación eléctrica funcional. 2ºEMG biofeedback-asistido, EMSP y estimulación y estimulación eléctrica dinámica. 3ºEMG biofeedback-asistido, EMSP en mujeres con IUE capaces de contraer SP. | 108 mujeres con IUE o IUM. Tres grupos divididos aleatoriamente. Grupo A(N=36): EMG biofeedback-asistido. Grupo B(N=36): EMG biofeedback-asistido, EMSP y estimulación y estimulación eléctrica dinámica. Grupo C(N=36): EMG biofeedback-asistido, EMSP en mujeres con IUE capaces de contraer SP. | Evaluación de la MSP: palpación digital (escala de Oxford) y EMG intravaginal. Cantidad de pérdida de orina: pad test (realizando diferentes actividades). Evaluación de la calidad de vida: KHQ y una escala analógica visual (estrés psicológico).                                                                                                                                                                                                     | Protocolo grupo A: EMG biofeedback-asistido.<br>Protocolo grupo B: EMG biofeedback-asistido, EMSP y estimulación y estimulación eléctrica dinámica<br>-<br>Protocolo grupo C: EMG biofeedback-asistido, EMSP en mujeres con IUE capaces de contraer SP. | Abandonos: Grupo A(N=3), grupo B(N=8) y grupo C(N=9). Incremento significativo de la calidad de vida. Reducción del número de compresas utilizadas.<br>Pad test mejoró: disminución de la cantidad de pérdida.<br>Contractilidad del SP: mejoró de forma significativa. No hubo diferencias significativas entre los tres grupos. | 1. El estudio muestra una mejora significativa en la calidad de vida de las pacientes que realizaron el tratamiento conservador. No hubo diferencias entre los tres tipos de tratamiento. La estimulación eléctrica adicional no produjo ningún beneficio en las pacientes con IUE que eran capaces de realizar una CV del SP. |

|                           |                                                                                                                                                   |                                                                                                                                                                                        |                                                                                                                                                                                                                                                                                                                                           |                                                                                                                                                                                                            |                                                                                                                                                                                                                                                                                                                                                                                                                                                                                          |                                                                                                                                                                                           |
|---------------------------|---------------------------------------------------------------------------------------------------------------------------------------------------|----------------------------------------------------------------------------------------------------------------------------------------------------------------------------------------|-------------------------------------------------------------------------------------------------------------------------------------------------------------------------------------------------------------------------------------------------------------------------------------------------------------------------------------------|------------------------------------------------------------------------------------------------------------------------------------------------------------------------------------------------------------|------------------------------------------------------------------------------------------------------------------------------------------------------------------------------------------------------------------------------------------------------------------------------------------------------------------------------------------------------------------------------------------------------------------------------------------------------------------------------------------|-------------------------------------------------------------------------------------------------------------------------------------------------------------------------------------------|
| Fillmore et al.<br>(2011) | 1. Comparar los efectos del programa tradicional de EMSP con un programa de EMSP asistido que incluye contracción de la musculatura de la cadera. | 11 mujeres. Rango 42-74 años. Dos grupos divididos aleatoriamente. Grupo EMSP(N=6) y grupo EMSP asistido(N=5).                                                                         | Evaluación urodinámica. Registro de 24/72 h sobre la frecuencia de la pérdida. Cuestionario sobre incontinencia (ICIQ UI SF)(UDI-6 SF). Examen del SP. Historia del paciente. Cuestionarios: grado de incontinencia(ICIQ UI SF), problemas urogenitales(UDI-6 SF), índice de severidad de incontinencia(ISI). Diario miccional de 4 días. | Ambos grupos realizaban los ejercicios 2 veces/semana, mañana y tarde, todos los días. 1. EMSP 2. EMSP asistido.                                                                                           | Completaron el estudio 6 sujetos, 2 en EMSP y 4 en EMSP asistido. Datos EMG: ambos entrenamientos mostraron una mejora estadísticamente significativa en la medida del mantenimiento de contracción, lenta(p=0.029), media(p=0.01), corta(p=0.002). No hubo diferencias entre los grupos. Test emparejados hay diferencias significativas en el pre/post-test, ICIQ UI(p=0.025), UDI-6 (p=0.028), ISI(p=0.038)                                                                           | 1. Se ha demostrado que, el EMSP, tradicional o asistido, reduce los síntomas de IUE mejorando la calidad de vida.                                                                        |
| Pereira et al.<br>(2011)  | 1. Comparar los efectos del EMSP en sesiones grupales e individuales con otro grupo de mujeres con IUE al que no se le aplica tratamiento.        | 49 mujeres de más de 18 años de edad con IUE. Tres grupos divididos aleatoriamente. Tratamiento en grupo(N=17), tratamiento individual(N=17) y grupo control(N=15).                    | Examen físico completo. Historial médico. Cantidad de pérdida de orina: pad test (1h realizando actividades de vida diaria). Evaluación de la calidad de vida (KHQ). Evaluación de la presión de MSP: perineometría, sonda vaginal. Evaluación de la fuerza: palpación digital (escala de Oxford). Cuestionario sobre satisfacción.       | Tratamiento en grupo y tratamiento individual: Enseñanza de anatomía de SP, mecanismos de continencia, correcta contracción, ejercicios en diferentes posiciones. El grupo control no recibió tratamiento. | 4 mujeres no terminaron tratamiento. Dos en tratamiento en grupo y dos en tratamiento individual. Pad test: se redujo la pérdida de orina en ambos grupos, pero fue más significativa en tratamiento individual. Evaluación de la presión de MSP: aumentó significativamente en los dos grupos. Evaluación de la fuerza: mejoró significativamente en los dos grupos según escala Oxford. Cuestionario sobre satisfacción: 86% de cada grupo informaron positivamente del tratamiento.   | 1. Los resultados indicaron una mejora similar en las variables clínicas y en la satisfacción tanto con el tratamiento en grupo como con el entrenamiento individual.                     |
| Ferreira et al.<br>(2012) | 1. Comparar eficacia de programa de ESP supervisado y programa de ejercicios realizado sin supervisión para el tratamiento de la IUE en mujeres.  | 38 mujeres con IU. Dos grupos divididos aleatoriamente. Grupo programa de ejercicios en casa(N=18), grupo programa de ejercicios en casa más programa de ejercicios supervisado(N=20). | CMV: presión dentro de la vagina durante CMV de MSP se midió con un perineómetro. Cantidad de pérdida de orina: pad test. Frecuencia de pérdida de orina: diario miccional de 7 días. Cuestionario de percepción de mejora (sólo al final del estudio).                                                                                   | Folleto informativo y sesión educativa de 60' en ambos grupos. 1. Programa de ejercicios de SP en casa. 2. Programa de ejercicios en casa más programa de ejercicios supervisado.                          | 4 de las 38 mujeres abandonaron el estudio, 1 del programa de ejercicios en casa y 3 del entrenamiento supervisado. Valores absolutos de fuerza en CMV: mejoró en ambos grupos, pero significativamente mayor en entrenamiento supervisado (P = 0,006). Pad test: ambos grupos mejoraron, no hubo diferencia significativa (P <0.05). Frecuencia de pérdida: en ambos se redujo, no hubo diferencia significativa (P=0.125). Percepción de mejora: mayor en grupo supervisado (P=0.018). | 1. El programa de ejercicios en casa produjo beneficios pero hubo una mejora mucho mayor en las mujeres que realizaron el programa de ejercicios en casa más los ejercicios supervisados. |

|                                              |                                                                                                                                                                                                                               |                                                                             |                                                                                                                                                                                                                                     |                                                                                                                                                                                                                                                                                                                                                                                                                                                                                                                                                                                                                                                                                                                    |                                                                                                                                                                                                                                                                                                                                                                                                                                                |
|----------------------------------------------|-------------------------------------------------------------------------------------------------------------------------------------------------------------------------------------------------------------------------------|-----------------------------------------------------------------------------|-------------------------------------------------------------------------------------------------------------------------------------------------------------------------------------------------------------------------------------|--------------------------------------------------------------------------------------------------------------------------------------------------------------------------------------------------------------------------------------------------------------------------------------------------------------------------------------------------------------------------------------------------------------------------------------------------------------------------------------------------------------------------------------------------------------------------------------------------------------------------------------------------------------------------------------------------------------------|------------------------------------------------------------------------------------------------------------------------------------------------------------------------------------------------------------------------------------------------------------------------------------------------------------------------------------------------------------------------------------------------------------------------------------------------|
| Liebergall-Wischnitzer, et al. (2013)RESUMEN | 1. Examinar la eficacia a largo plazo de un protocolo de ejercicios basado en el fortalecimiento muscular circular (método Paula) comparado con un programa de EMSP, en los síntomas de IUE a los 6 meses de la intervención. | 1. 143 mujeres con IUE. Grupo 1: método Paula (N=64). Grupo 2: EMSP (N=79). | 2 programas de ejercicio (12 sesiones particulares del método Paula vs 6 sesiones en grupo de EMSP) durante un período de 12 semanas. Se realizó un seguimiento de seis meses recogiendo datos a través de entrevistas telefónicas. | No hubo empeoramiento significativo en los síntomas de IUE en los grupos seis meses después de finalizar la intervención. Ambos métodos produjeron mejoras. Se encontró diferencia estadísticamente significativa entre los grupos con respecto a la frecuencia de pérdida de orina: 25 de las pacientes (39,7%) de método Paula informaron de una disminución en la frecuencia de pérdida de orina una vez completado el estudio, en comparación con 18 (22,8%) en el grupo de EMSP (P = 0,03). 49 de las 64 mujeres del grupo de Paula (76,6%) y 62 de las 79 mujeres del grupo de EMSP (78,5%) informaron de que continuaron realizando el tratamiento 6 meses después de la finalización del ensayo (P = 0,8). | 1. Ambos métodos de intervención reducen la frecuencia de pérdida de orina en un período de 6 meses.<br>2. La adherencia a largo plazo fue similar en ambos grupos.<br>3. El EMSP se asoció con un menor número de sesiones, un menor coste y un menor número de sesiones necesarias para el aprendizaje en comparación con el método de Paula.<br>4. El método Paula reduce más la frecuencia de pérdida de orina en comparación con el EMSP. |
|----------------------------------------------|-------------------------------------------------------------------------------------------------------------------------------------------------------------------------------------------------------------------------------|-----------------------------------------------------------------------------|-------------------------------------------------------------------------------------------------------------------------------------------------------------------------------------------------------------------------------------|--------------------------------------------------------------------------------------------------------------------------------------------------------------------------------------------------------------------------------------------------------------------------------------------------------------------------------------------------------------------------------------------------------------------------------------------------------------------------------------------------------------------------------------------------------------------------------------------------------------------------------------------------------------------------------------------------------------------|------------------------------------------------------------------------------------------------------------------------------------------------------------------------------------------------------------------------------------------------------------------------------------------------------------------------------------------------------------------------------------------------------------------------------------------------|

GE: grupo experimental; GC: grupo control; SP: suelo pélvico; IU: incontinencia urinaria; EMSP: entrenamiento de la musculatura del suelo pélvico; ESP: entrenamiento suelo pélvico; IUE: incontinencia urinaria de esfuerzo; MSP: musculatura del suelo pélvico; ICIQ UI-SF: International Consultation on Incontinence Questionnaire-Short form; CMV: contracción máxima voluntaria; CV: contracción voluntaria; FMSP: fuerza de la musculatura del suelo pélvico; TA: transvers abdominal; KHQ: king health questionnaire; EMG: electromiografía.
